# Supplementary material for: Bio-electrostatic sensitive droplet lasers for molecular detection
Source: Royal Society of Chemistry journal article supplement (doi:10.1039/d0na00107d), 2020-01-01
Supplement: d0na00107d1.pdf [file d0na00107d1.pdf]

## Supplementary Information

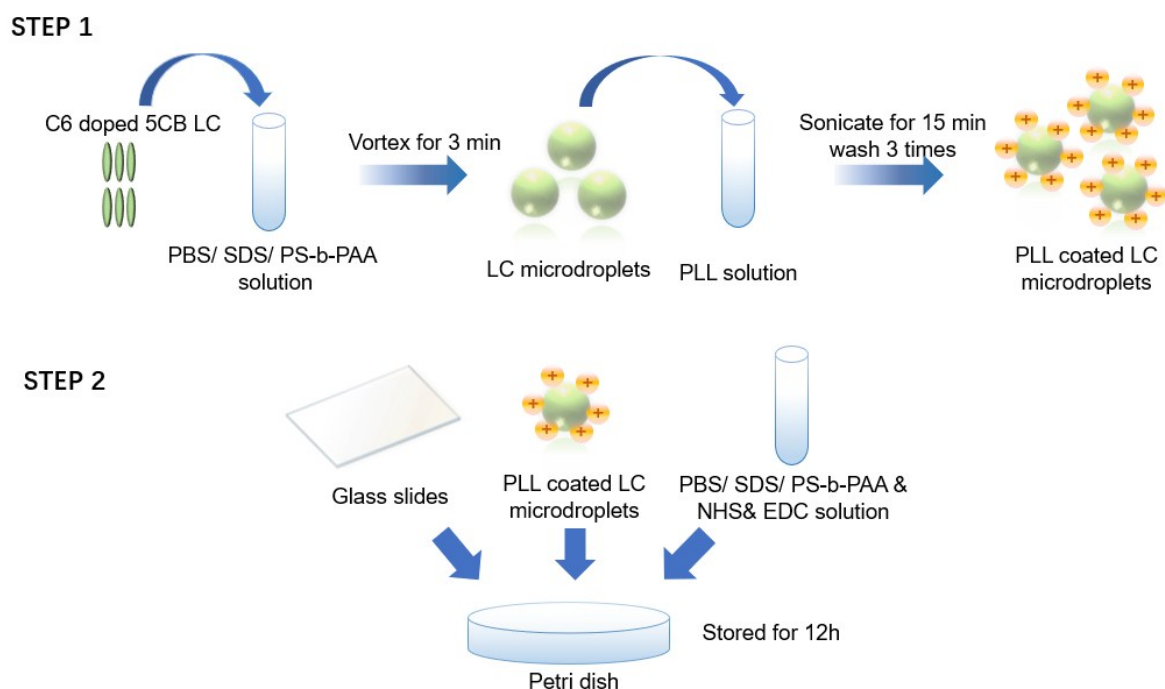

**Figure S1.** Preparation of liquid crystal microdroplet. Step 1 shows the preparation of PLL coated LC microdroplets. To immobilize the microdroplets on the glass slides, 5CB microdroplets were added into PBS/SDS/PS-b-PAA solution with NHS/EDC and stored under room temperature for 12 hours (as shown in Step 2).

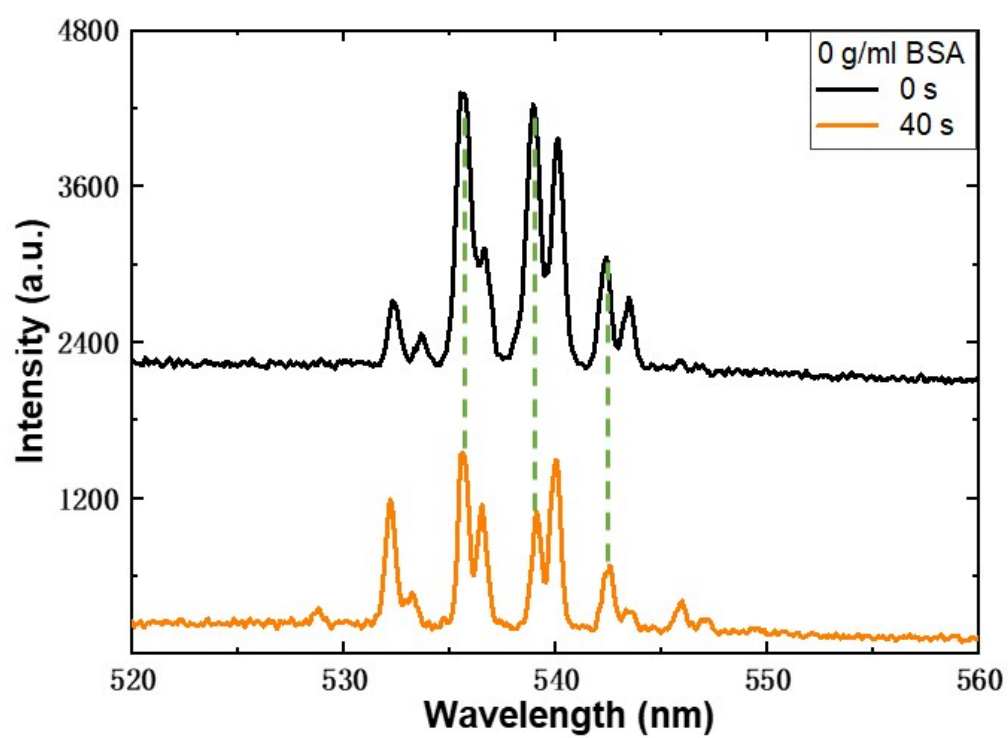

**Figure S2.** Spectrum under 0 mg/ml BSA (only PBS solution), as a control experiment. Only a small wavelength shift ( $\ll 0.1\text{nm}$ ) was detected.

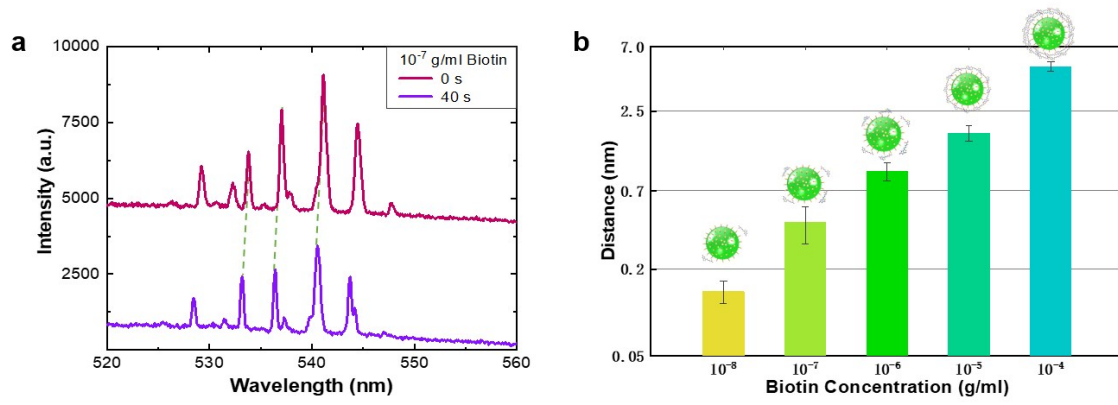

**Figure S3.** By taking advantage of the specific binding between streptavidin and biotin, streptavidin was coated on LC microdroplet surface to capture/bind with biotin molecules in the surrounding solution. **(a)** WGM lasing spectra of LC microdroplet before and after applying  $10^{-7}$  g/ml of biotin. **(b)** Summary of lasing wavelength shift under various concentrations of biotin.  $\alpha=0.0061$ ;  $k=0.38229$ ; Limit of detection= $4.7 \times 10^{-10}$  g/ml.
